# Supplementary material for: A developed Ullmann reaction to III–V semiconductor nanocrystals in sealed vacuum tubes
Source: Royal Society of Chemistry journal article supplement (doi:10.1039/b809442j), 2008-01-01
Supplement: b809442j.pdf [file b809442j.pdf]

Electronic Supplementary Information (ESI) available:

## A Developed Ullmann Reaction to III–V Semiconductor

### Nanocrystals in Sealed Vacuum Tubes

Junli Wang and Qing Yang\*

*Hefei National Laboratory for Physical Science at Microscale and Department of Chemistry,  
University of Science and Technology of China (USTC), Hefei, Anhui 230026, P. R. China. Tel:  
+86-551-3600243, Fax: +86-551-3606266, E-mail: qyoung@ustc.edu.cn.*

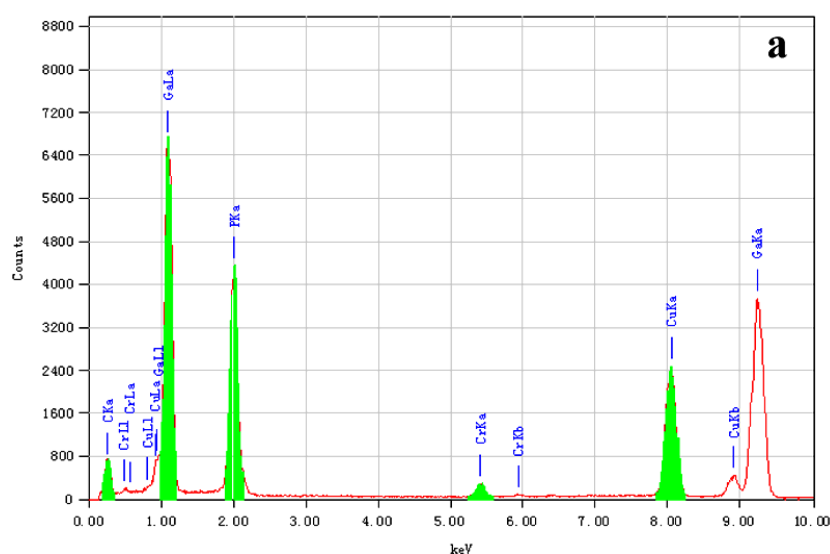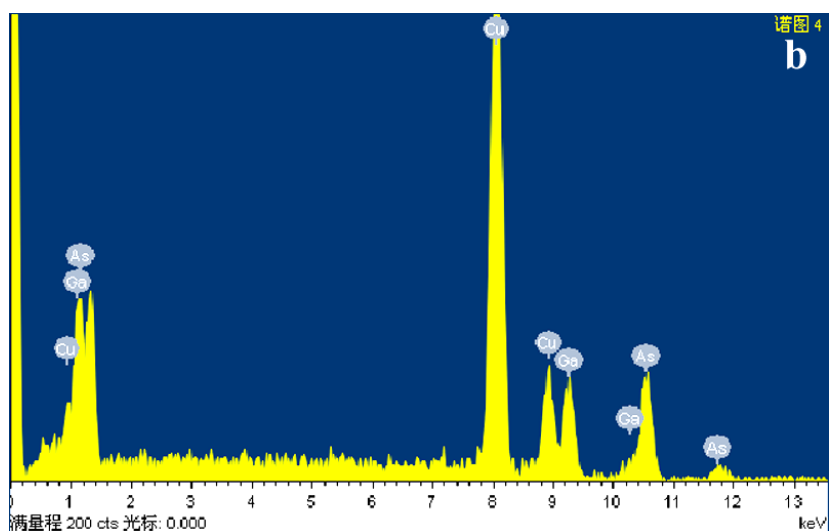

**Figure 1S:** Energy-dispersive X-ray spectroscopy (EDX) spectra of (a) the GaP products synthesized using 1 : 1.2 Ga : PPh<sub>3</sub> at 380 °C for 12 h; and (b) the GaAs products synthesized using 3 : 1 Ga : AsPh<sub>3</sub> at 360 °C for 24 h. The composition of the two products was close to 1:1 determined by EDX. The peaks of Cu and Cr are from the Cu grid of TEM.
